# Supplementary material
Source: ML conference proceedings conference paper supplement (https://openreview.net/forum?id=GCNIm4cKoRx)
Supplement: supplementary_material [file attachment]

## Supplementary materials for

### *Finite-Time Analysis of Adaptive Temporal Difference Learning with Deep Neural Networks*

#### Nomenclature

- $L, m$  Length and width of the deep ReLU.
- $\mathcal{A}$  The action space.
- $\beta$  Momentum hyper-paramter.
- $\eta$  Hyper-paramter in the adaptive stepsize.
- $\mathbf{h}(\boldsymbol{\theta})$  Used in Definition 1 and mathematically defined as  $\mathbf{h}(\boldsymbol{\theta}) := \mathbb{E} \left[ \hat{\Delta}(\boldsymbol{\theta}) \nabla_{\boldsymbol{\theta}} \hat{f}(\boldsymbol{\theta}; \phi(s, a)) \right]$ .
- $\mathcal{F}_{\mathbf{V}, m}, \hat{f}$  The collection of all local linearization of  $f(\boldsymbol{\theta}; \phi(s, a))$  at the initial point  $\boldsymbol{\theta}^{\text{init}}$ ,  $\hat{f}$  is element of  $\mathcal{F}_{\mathbf{V}, m}$
- $\bar{\mathbf{h}}(\boldsymbol{\theta}^{k-T})$  Technical item defined as  $\bar{\mathbf{h}}(\boldsymbol{\theta}^{k-T}) := \hat{\Delta}(s_k, a_k, s_{k+1}, a_{k+1}; \boldsymbol{\theta}^{k-T}) \nabla_{\boldsymbol{\theta}} \hat{f}(\boldsymbol{\theta}^{k-T}; \phi(s_k, a_k))$ .
- $\mathbf{Q}_{\pi}$  Action-value function with policy  $\pi$ .
- $\mathcal{T}_{\pi}$  Bellman operator associated with  $\pi$ .
- $\boldsymbol{\theta}^{\text{init}}$  The initial point.
- $f(\boldsymbol{\theta}; \mathbf{x})$  L-hidden-layer ReLU neural network defined as  $f(\boldsymbol{\theta}; \mathbf{x}) = \sqrt{m} \mathbf{W}_L \sigma(\mathbf{W}_{L-1} \cdots \sigma(\mathbf{W}_1 \mathbf{x}) \cdots)$ , where  $\mathbf{x} \in \mathbb{R}^d$  is the input data,  $\mathbf{W}_1 \in \mathbb{R}^{m \times d}$ ,  $\mathbf{W}_L \in \mathbb{R}^{1 \times m}$  and  $\mathbf{W}_l \in \mathbb{R}^{m \times m}$  for  $l = 2, \dots, L-1$ ,  $\boldsymbol{\theta} := [\mathbf{W}_1, \dots, \mathbf{W}_L]$  denotes all the weights.
- $\mathbb{E}[\cdot]$  Expectation with respect to the underlying probability space *without* stochasticity of the initial point.
- $\gamma$  The discount factor.
- $\hat{\Delta}$  Temporal difference error defined by (8).
- $\mu$  Stationary distribution of the states.
- $\omega$  Radius.
- $\bar{\mathbf{g}}(\boldsymbol{\theta}; s_k, a_k, s_{k+1}, a_{k+1})$  Semi-gradient sampling operator denoted by (4).
- $\mathcal{P}_a$  The transition matrix associated with action  $a$ .
- $\phi(s, a) : \mathcal{S} \times \mathcal{A} \rightarrow \mathbb{R}^d$  State-action feature mapping.
- $\pi, \pi(s, a)$  Policy, the probability to choose action  $a$  when the current state is  $s$ .
- $\text{Proj}_{\mathbf{V}}(\mathbf{x})$  Projection of  $\mathbf{x}$  onto set  $\mathbf{V}$ .
- $\mathcal{S}$  The state space.
- $\sigma(\cdot)$  ReLU activation function.
- $\boldsymbol{\theta}^*$  Approximate stationary point (Definition 1).
- $\boldsymbol{\theta}^k, \mathbf{m}^k, v^k$  The value, momentum and sum of past stochastic semi-gradients' norms in the  $k$ th iteration of adaptive TD with DNN.
- $r(s, a)$  The reward with pair  $(s, a)$ .
- $\mathbf{B}(\boldsymbol{\theta}, \omega)$  The ball centred at  $\boldsymbol{\theta}$  with radius  $\omega$ .
- $\mathbf{g}^k$  Stoch semi-gradient in  $k$ th iteration.
- $\mathbf{V}_{\pi}$  Value function associated with  $\pi$ .

## A Other Technical Lemmas

In the proofs, we use three shorthand notations for simplifications. Those three notations are all related to the iteration  $k$ . Assume  $(\mathbf{m}^k)_{k \geq 0}$ ,  $(\boldsymbol{\theta}^k)_{k \geq 0}$ ,  $(v^k)_{k \geq 0}$  are all generated by the neural adaptive TD. We denote

$$\begin{aligned}
\Xi_k &:= \mathbb{E}(\|\mathbf{m}^k\|^2/(v^k)), \\
\Upsilon_k &:= \mathbb{E}\left(\langle \boldsymbol{\theta}^k - \boldsymbol{\theta}^*, \mathbf{m}^k \rangle / (v^k)^{\frac{1}{2}}\right), \\
\mathfrak{R}_k &:= (1 - \beta)(1 + \gamma)C_3C_4\sqrt{m \log(K/\delta)} \sum_{h=1}^T \Xi_{k-h} \\
&\quad + (1 - \beta)(1 + \gamma)C_3C_4\sqrt{m \log(K/\delta)} \frac{(1 - \beta)\omega^2 LT}{\varpi} \\
&\quad + \eta\beta\Xi_k + \frac{(1 - \beta)(2 + \gamma)C_3C_4\omega\bar{\kappa}\sqrt{Lm \log \frac{K}{\delta}}}{\sqrt{\varpi}} \rho^T \\
&\quad + \omega(2 + \gamma)C_7\sqrt{Lm \log(K/\delta)} \left[ \frac{1}{(v^{k-1})^{\frac{1}{2}}} - \frac{1}{(v^k)^{\frac{1}{2}}} \right] \\
&\quad + \frac{\omega\sqrt{L}(1 - \beta)}{(v^k)^{\frac{1}{2}}} (C_3(2 + \gamma)\omega^{1/3}L^3\sqrt{m \log m \log(K/\delta)} \\
&\quad + C_4\omega^{4/3}L^4\sqrt{m \log m} + C_5\omega^2L^4m).
\end{aligned} \tag{20}$$

The technical lemmas are all described using the notations given above.

**Lemma 4** Let  $(\Xi_k)_{k \geq 0}$  be defined in (20) and  $v^1 \geq \varpi > 0$ , then we have

$$\sum_{k=1}^K \Xi_k \leq \sum_{j=1}^{K-1} \|\mathbf{g}^j\|^2 / v^j.$$

Further, if condition (9) holds, we then get

$$\sum_{k=1}^K \Xi_k \leq \log \left[ \frac{(K-1)(2 + \gamma)^2 C_7^2 m \log(K/\delta)}{\varpi} \right].$$

with probability at least  $1 - 2\delta - 3L^2 \exp(-C_6 m \omega^{2/3} L)$  over the randomness of the initial point.

**Lemma 5** Assume condition (9) holds, given  $T \in \mathbb{Z}^+$ , with probability at least  $1 - 2\delta - 3L^2 \exp(-C_6 m \omega^{2/3} L)$ , we have

$$\begin{aligned}
\mathbb{E} \left[ \langle \boldsymbol{\theta}^k - \boldsymbol{\theta}^*, \mathbf{g}^k \rangle / (v^{k-1})^{\frac{1}{2}} \right] &\leq \mathbb{E} \left[ \langle \boldsymbol{\theta}^k - \boldsymbol{\theta}^*, \mathbf{h}(\boldsymbol{\theta}^k) \rangle / (v^{k-1})^{\frac{1}{2}} \right] \\
&\quad + \frac{\omega\sqrt{L}}{(v^k)^{\frac{1}{2}}} (C_3(2 + \gamma)\omega^{1/3}L^3\sqrt{m \log m \log(K/\delta)} + C_4\omega^{4/3}L^4\sqrt{m \log m} + C_5\omega^2L^4m) \\
&\quad + \frac{(2 + \gamma)C_3C_4\omega\bar{\kappa}\sqrt{Lm \log \frac{K}{\delta}} \rho^T}{\sqrt{\varpi}} + (1 + \gamma)C_3C_4\sqrt{m \log(K/\delta)} \left( \sum_{h=1}^T \frac{\mathbb{E}\|\mathbf{m}^{k-h}\|^2}{v^{k-h}} + \frac{\omega^2 LT}{\varpi} \right).
\end{aligned}$$

**Lemma 6** Let  $(\Upsilon_k)_{k \geq 0}$  and  $(\mathfrak{R}_k)_{k \geq 0}$  be defined in (20), then the following result holds for neural adaptive TD

$$\Upsilon_k + (1 - \beta)\mathbb{E} \left( \langle \boldsymbol{\theta}^k - \boldsymbol{\theta}^*, \mathbf{h}(\boldsymbol{\theta}^k) \rangle / (v^{k-1})^{\frac{1}{2}} \right) \leq \beta\Upsilon_{k-1} + \mathfrak{R}_k. \tag{21}$$

## B Proof of Theorem 1

The bounds in the proof are all with probability at least  $1 - 2\delta - 3L^2 \exp(-C_6 m \omega^{2/3} L)$ . Given  $K \in \mathbb{Z}^+$ , summing  $k = 1$  to  $K$  of (21) gives us

$$\begin{aligned}
& (1 - \beta) \sum_{k=T+1}^K \mathbb{E} \left( \langle \boldsymbol{\theta}^k - \boldsymbol{\theta}^*, \mathbf{h}(\boldsymbol{\theta}^k) \rangle / (v^{k-1})^{\frac{1}{2}} \right) \\
& \leq -\Upsilon_K + (1 - \beta) \sum_{k=T}^{K-1} (-\Upsilon_k) + \sum_{k=T+1}^K \mathfrak{R}_k \\
& \leq (1 - \beta) \sum_{k=T}^{K-1} (-\Upsilon_k) + \sum_{k=T+1}^K \mathfrak{R}_k + \frac{\omega(2 + \gamma)C_7 \sqrt{m \log(K/\delta)}}{(v^K)^{\frac{1}{2}}},
\end{aligned} \tag{22}$$

where we used the fact that  $\mathbf{m}^k \leq (2 + \gamma)C_7 \sqrt{m \log(K/\delta)}$  when  $k \leq K$ . The convex projection is contractive,

$$\begin{aligned}
\|\boldsymbol{\theta}^* - \boldsymbol{\theta}^{k+1}\|^2 & \leq \|\boldsymbol{\theta}^* - \boldsymbol{\theta}^k - \eta \mathbf{m}^k / (v^k)^{\frac{1}{2}}\|^2 \\
& \leq \|\boldsymbol{\theta}^* - \boldsymbol{\theta}^k\|^2 + 2\eta \langle \mathbf{m}^k, \boldsymbol{\theta}^k - \boldsymbol{\theta}^* \rangle / (v^k)^{\frac{1}{2}} + \eta^2 \|\mathbf{m}^k\|^2 / v^k.
\end{aligned}$$

Taking the total condition expectation gives us

$$\mathbb{E} \|\boldsymbol{\theta}^* - \boldsymbol{\theta}^{k+1}\|^2 \leq \mathbb{E} \|\boldsymbol{\theta}^* - \boldsymbol{\theta}^k\|^2 + 2\eta \Upsilon_k + \eta^2 \Xi_k,$$

which directly indicates the following inequality

$$\sum_{k=T}^{K-1} -\Upsilon_k \leq \frac{\mathbb{E} \|\boldsymbol{\theta}^* - \boldsymbol{\theta}^T\|^2}{2\eta} + \frac{\eta}{2} \sum_{k=T}^{K-1} \Xi_k.$$

With (22), we can derive

$$\begin{aligned}
& \sum_{k=T+1}^K \mathbb{E} \left( \langle \boldsymbol{\theta}^k - \boldsymbol{\theta}^*, \mathbf{h}(\boldsymbol{\theta}^k) \rangle / (v^{k-1})^{\frac{1}{2}} \right) \\
& \leq \sum_{k=T}^{K-1} (-\Upsilon_k) + \frac{1}{1 - \beta} \sum_{k=T+1}^K \mathfrak{R}_k + \omega(2 + \gamma)C_7 \sqrt{m \log(K/\delta)} / [(1 - \beta)(\varpi)^{\frac{1}{2}}] \\
& \leq \frac{\mathbb{E} \|\boldsymbol{\theta}^* - \boldsymbol{\theta}^T\|^2}{\eta} + \eta \sum_{k=T}^{K-1} \Xi_k + \frac{1}{1 - \beta} \sum_{k=T+1}^K \mathfrak{R}_k + \omega(2 + \gamma)C_7 \sqrt{m \log(K/\delta)} / [(1 - \beta)(v^K)^{\frac{1}{2}}].
\end{aligned} \tag{23}$$

We use the following shorthand notations

$$\begin{aligned}
\aleph_0 & = (1 - \beta)(1 + \gamma)C_3 C_4 \sqrt{m \log(K/\delta)} \frac{(1 - \beta)\omega^2 L T}{\varpi}, \\
\aleph_1 & := \frac{(2 + \gamma)C_3 C_4 \omega \bar{\kappa} \sqrt{L m \log \frac{K}{\delta}}}{\sqrt{\varpi}}, \\
\aleph_2 & := \omega(2 + \gamma)C_7 \sqrt{L m \log(K/\delta)}, \\
\aleph_3 & := \omega \sqrt{L} (C_3(2 + \gamma)\omega^{1/3} L^3 \sqrt{m \log m \log(K/\delta)} \\
& \quad + C_4 \omega^{4/3} L^4 \sqrt{m \log m} + C_5 \omega^2 L^4 m).
\end{aligned}$$

Using Lemma 7 and Lemma 4, we have the following bound

$$\begin{aligned}
& \eta \sum_{k=T}^{K-1} \Xi_k + \frac{1}{1-\beta} \sum_{k=T+1}^K \Re_k \\
& \leq (1+\gamma)C_3C_4\eta\sqrt{m\log(K/\delta)} \sum_{k=T+1}^K \sum_{j=1}^T \Xi_{k-j} + \eta \sum_{k=T}^{K-1} \Xi_k + \frac{\eta\beta}{1-\beta} \sum_{k=T+1}^K \Xi_k + \frac{\aleph_2}{(v^K)^{1/2}} \\
& \quad + \aleph_1\rho^T(K-T) + \aleph_0(K-T) + \sum_{k=T}^K \frac{\aleph_3}{(v^{k-1})^{\frac{1}{2}}} \\
& \leq \left( \eta + (1+\gamma)C_3C_4\eta\sqrt{m\log(K/\delta)}T^2 + \frac{\eta\beta}{1-\beta} \right) \times \sum_{k=1}^K \Xi_k \\
& \quad + \frac{\aleph_2}{(v^K)^{1/2}} + \aleph_1\rho^T(K-T) + \aleph_0(K-T) + \sum_{k=T}^K \frac{\aleph_3}{(v^{k-1})^{\frac{1}{2}}}.
\end{aligned}$$

Further with Lemma 4, the upper bound of right side is bounded by

$$\begin{aligned}
& \left( \eta + (1+\gamma)C_3C_4\eta\sqrt{m\log(K/\delta)}T^2 + \frac{\eta\beta}{1-\beta} \right) \times \log \left[ \frac{(K-1)(2+\gamma)^2C_7^2m\log(K/\delta)}{\varpi} \right] \\
& \quad + \frac{\aleph_2}{(v^K)^{1/2}} + \aleph_1\rho^T(K-T) + \aleph_0(K-T) + \sum_{k=T}^K \frac{\aleph_3}{(v^{k-1})^{\frac{1}{2}}}.
\end{aligned} \tag{24}$$

On the other hand, we have

$$\begin{aligned}
& \sum_{k=T}^K \mathbb{E}(\boldsymbol{\theta}^k - \boldsymbol{\theta}^*, \mathbf{h}(\boldsymbol{\theta}^k)) / (v^{k-1})^{\frac{1}{2}} \\
& \geq \sum_{k=T}^K \frac{(1-\gamma)\mathbb{E}(\hat{f}(\boldsymbol{\theta}^k; s, a) - \hat{f}(\boldsymbol{\theta}^*; s, a))^2}{(v^{k-1})^{\frac{1}{2}}} \\
& \geq \left[ \sum_{k=T}^K \frac{(1-\gamma)}{(v^{k-1})^{\frac{1}{2}}} \right] \cdot \min_{T \leq k \leq K} \mathbb{E}(\hat{f}(\boldsymbol{\theta}^k; s, a) - \hat{f}(\boldsymbol{\theta}^*; s, a))^2.
\end{aligned} \tag{25}$$

Thus, we can get

$$\begin{aligned}
& \min_{T \leq k \leq K} \mathbb{E}(\hat{f}(\boldsymbol{\theta}^k; s, a) - \hat{f}(\boldsymbol{\theta}^*; s, a))^2 \\
& \leq \left( \eta + (1+\gamma)C_3C_4\eta\sqrt{m\log(K/\delta)}T^2 + \frac{\eta\beta}{1-\beta} \right) \\
& \quad \times \log \left[ \frac{(K-1)(2+\gamma)^2C_7^2m\log(K/\delta)}{\varpi} \right] / \left[ \sum_{k=T}^K \frac{(1-\gamma)}{(v^{k-1})^{\frac{1}{2}}} \right] \\
& \quad + \frac{\frac{(1+\beta)\aleph_2}{(v^K)^{1/2}} + (\aleph_1\rho^T + \aleph_0)(K-T) + \sum_{k=T}^K \frac{\aleph_3}{(v^{k-1})^{\frac{1}{2}}} + \frac{L\omega^2}{\eta}}{\left( \sum_{k=T}^K \frac{(1-\gamma)}{(v^{k-1})^{\frac{1}{2}}} \right)}.
\end{aligned} \tag{26}$$

Notice that  $(v^k)_{k \geq 0}$  is increasing,  $\sum_{k=T}^K \frac{(1-\gamma)}{(v^{k-1})^{\frac{1}{2}}} \geq \frac{(K-T)(1-\gamma)}{(v^{K-1})^{\frac{1}{2}}}$ , and thus

$$\left[ \frac{(1+\beta)\aleph_2}{(v^K)^{1/2}} \right] / \left[ \sum_{k=T}^K \frac{(1-\gamma)}{(v^{k-1})^{\frac{1}{2}}} \right] \leq \frac{(1+\beta)\aleph_2}{(K-T)(1-\gamma)} \frac{(v^{K-1})^{\frac{1}{2}}}{(v^K)^{\frac{1}{2}}} \leq \frac{(1+\beta)\aleph_2}{(K-T)(1-\gamma)}. \tag{27}$$

On the other hand, from Lemma 1, with high probabilities,  $v^k \leq (2 + \gamma)^2 C_7^2 m \log(K/\delta) k$  when  $k \leq K$ , and then we can get

$$\sum_{k=T}^K 1/(v^k)^{\frac{1}{2}} \geq \sum_{k=T}^K \frac{1}{C_0(m \log(K/\delta)k)^{\alpha/2}} \geq \frac{2(K^{1-\alpha/2} - T^{1-\alpha/2})}{\alpha C_0(m \log(K/\delta))^{\alpha/2}} \geq \frac{K^{1-\alpha/2}}{\alpha C_0(m \log(K/\delta))^{\alpha/2}}, \quad (28)$$

where we used  $K \geq 2^{\frac{2}{2-\alpha}} T$  to get  $2(K^{1-\alpha/2} - T^{1-\alpha/2}) \geq K^{1-\alpha/2}$ . Combing (27), (28) and (26), we are led to

$$\begin{aligned} & \min_{1 \leq k \leq K} \mathbb{E}(\hat{f}(\boldsymbol{\theta}^k; s, a) - \hat{f}(\boldsymbol{\theta}^*; s, a))^2 \\ & \leq \min_{T \leq k \leq K} \mathbb{E}(\hat{f}(\boldsymbol{\theta}^k; s, a) - \hat{f}(\boldsymbol{\theta}^*; s, a))^2 \\ & \leq \left( (1 + \gamma) C_3 C_4 \eta \sqrt{m \log(K/\delta)} T^2 + \frac{\eta + \eta\beta}{(1 - \gamma)(1 - \beta)} \right) \times \log \left[ \frac{(K - 1)(2 + \gamma)^2 C_7^2 m \log(K/\delta)}{\varpi} \right] \\ & \times C_0(m \log(K/\delta))^{\alpha/2} / K^{1-\alpha/2} + \frac{\omega(2 + \gamma) C_0 C_7 L [m \log(K/\delta)]^{\frac{1+\alpha}{2}}}{(1 - \gamma)(1 - \beta) \sqrt{\varpi}} / K^{1-\alpha/2} \\ & + (1 - \beta)^2 (1 + \gamma) C_0 C_3 C_4 (m \log(K/\delta))^{\frac{\alpha+1}{2}} \frac{\omega^2 L T}{\varpi} / K^{1-\alpha/2} \\ & + \frac{(2 + \gamma) C_0 C_3 C_7 \omega \bar{\kappa} \sqrt{L m \log \frac{K}{\delta}} (m \log(K/\delta))^{\alpha/2}}{\sqrt{\varpi}(1 - \gamma)} \rho^T K^{\alpha/2} \\ & + \frac{\omega \sqrt{L}(1 - \beta)}{(1 - \gamma)} (C_3(2 + \gamma) \omega^{1/3} L^3 \sqrt{m \log m \log(K/\delta)}) \\ & + C_4 \omega^{4/3} L^4 \sqrt{m \log m} + C_5 \omega^2 L^4 m) + \frac{L \omega^2 C_0 (m \log(K/\delta))^{\alpha/2}}{(1 - \gamma) K^{1-\alpha/2}} + \frac{2(2 + \gamma) C_7 \omega \sqrt{L m \log(K/\delta)}}{(K - T)(1 - \gamma)}. \end{aligned}$$

Letting

$$\begin{aligned} c_1(m, \eta, \alpha, T, K) & := \left( (1 + \gamma) C_3 C_4 \eta \sqrt{m \log(K/\delta)} T^2 + \frac{\eta + \eta\beta}{(1 - \gamma)(1 - \beta)} \right) \\ & \times \log \left[ \frac{(K - 1)(2 + \gamma)^2 C_7^2 m \log(K/\delta)}{\varpi} \right] C_0(m \log(K/\delta))^{\frac{\alpha}{2}}, \\ c_2(m, \eta, \omega, \alpha, T, K) & := \frac{2\omega(2 + \gamma) C_0 C_7 L [m \log(K/\delta)]^{\frac{1+\alpha}{2}}}{(1 - \gamma)(1 - \beta) \sqrt{\varpi}} \\ & + \frac{L \omega^2 C_0 (m \log(K/\delta))^{\alpha/2}}{1 - \gamma} + \frac{2(2 + \gamma) C_7 \omega \sqrt{L m \log(K/\delta)}}{(K - T)(1 - \gamma)} \\ & + (1 - \beta)^2 (1 + \gamma) C_0 C_3 C_4 (m \log(K/\delta))^{\frac{\alpha+1}{2}} \frac{\omega^2 L T}{\varpi}, \\ c_3(m, \omega, \alpha, K) & := \frac{2(2 + \gamma) C_0 C_3 C_7 \omega \bar{\kappa} \sqrt{L m \log \frac{K}{\delta}} (m \log(K/\delta))^{\alpha/2}}{\sqrt{\varpi}(1 - \gamma)}, \\ c_4(m, \omega, K) & := \frac{\omega \sqrt{L}(1 - \beta)}{(1 - \gamma)} \left( C_3(2 + \gamma) \omega^{1/3} L^3 \sqrt{m \log m \log(K/\delta)} \right. \\ & \left. + C_4 \omega^{4/3} L^4 \sqrt{m \log m} + C_5 \omega^2 L^4 m \right), \end{aligned} \quad (29)$$

which complete the proof.

## C Proof of Proposition 2

The proof is similar to the the proof of [Theorem 5.6,[53]] and is presented here for completeness. With the Cauchy's inequality,

$$\begin{aligned} \mathbb{E}(f(\boldsymbol{\theta}^k; s, a) - \mathbf{Q}^*(s, a))^2 &\leq 3\mathbb{E}(f(\boldsymbol{\theta}^k; s, a) - \hat{f}(\boldsymbol{\theta}^k; s, a))^2 \\ &+ 3\mathbb{E}(\hat{f}(\boldsymbol{\theta}^k; s, a) - \hat{f}(\boldsymbol{\theta}^*; s, a))^2 + 3\mathbb{E}(\hat{f}(\boldsymbol{\theta}^*; s, a) - \mathbf{Q}^*(s, a))^2. \end{aligned} \quad (30)$$

With (Theorems 5.3 and 5.4 in [8]) and  $\omega = \Theta(m^{-1/2})$ , we have

$$\mathbb{E}(f(\boldsymbol{\theta}^k; s, a) - \hat{f}(\boldsymbol{\theta}^k; s, a))^2 = \tilde{\mathcal{O}}(m^{-1/3})$$

with probability at least  $1 - \delta$ .

Notice that that  $\hat{f}(\boldsymbol{\theta}^*; s, a)$  is the fixed point of  $\Pi_{\mathcal{F}_{\mathbf{V},m}} \mathcal{T}_\pi(\cdot)$  and  $\mathbf{Q}^*(s, a)$  is the fixed point of  $\mathcal{T}_\pi(\cdot)$ , respectively. For any  $(s, a)$ , we thus have

$$\begin{aligned} |\hat{f}(\boldsymbol{\theta}^*; s, a) - \mathbf{Q}^*(s, a)| &= |\hat{f}(\boldsymbol{\theta}^*; s, a) - \Pi_{\mathcal{F}_{\mathbf{V},m}} \mathcal{T}_\pi(\mathbf{Q}^*(s, a)) + \Pi_{\mathcal{F}_{\mathbf{V},m}} \mathcal{T}_\pi(\mathbf{Q}^*(s, a)) - \mathbf{Q}^*(s, a)| \\ &= |\mathbf{Proj}_{\mathcal{F}_{\mathbf{V},m}} \mathcal{T}_\pi(\hat{f}(\boldsymbol{\theta}^*; s, a)) - \Pi_{\mathcal{F}_{\mathbf{V},m}} \mathcal{T}_\pi(\mathbf{Q}^*(s, a)) + \Pi_{\mathcal{F}_{\mathbf{V},m}} \mathcal{T}_\pi(\mathbf{Q}^*(s, a)) - \mathbf{Q}^*(s, a)| \\ &= |\mathbf{Proj}_{\mathcal{F}_{\mathbf{V},m}} \mathcal{T}_\pi(\hat{f}(\boldsymbol{\theta}^*; s, a)) - \Pi_{\mathcal{F}_{\mathbf{V},m}} \mathcal{T}_\pi(\mathbf{Q}^*(s, a)) + \Pi_{\mathcal{F}_{\mathbf{V},m}}(\mathbf{Q}^*(s, a)) - \mathbf{Q}^*(s, a)| \\ &\leq \gamma |\hat{f}(\boldsymbol{\theta}^*; s, a) - \mathbf{Q}^*(s, a)| + |\Pi_{\mathcal{F}_{\mathbf{V},m}}(\mathbf{Q}^*(s, a)) - \mathbf{Q}^*(s, a)|, \end{aligned}$$

where we used that fact that  $\Pi_{\mathcal{F}_{\mathbf{V},m}} \mathcal{T}_\pi(\cdot)$  is  $\gamma$ -contract. Hence, we are led to

$$|\hat{f}(\boldsymbol{\theta}^*; s, a) - \mathbf{Q}^*(s, a)| \leq \frac{|\Pi_{\mathcal{F}_{\mathbf{V},m}}(\mathbf{Q}^*(s, a)) - \mathbf{Q}^*(s, a)|}{1 - \gamma}.$$

Turing back to (30),

$$\begin{aligned} \mathbb{E}(f(\boldsymbol{\theta}^k; s, a) - \mathbf{Q}^*(s, a))^2 &= \tilde{\mathcal{O}}(m^{-1/3}) + \mathbb{E}(\hat{f}(\boldsymbol{\theta}^k; s, a) - \hat{f}(\boldsymbol{\theta}^*; s, a))^2 + \frac{\mathbb{E}[(\Pi_{\mathcal{F}_{\mathbf{V},m}}(\mathbf{Q}^*(s, a)) - \mathbf{Q}^*(s, a))^2]}{(1 - \gamma)^2}. \end{aligned}$$

Note that  $\mathbb{E}(\hat{f}(\boldsymbol{\theta}^k; s, a) - \hat{f}(\boldsymbol{\theta}^*; s, a))^2$  has been bounded by Proposition 1, we then proved the result.

## D Proofs of Technical Lemmas

### D.1 Proof of Lemma 2

Given a fixed integer  $T$ , direct calculations give us

$$\begin{aligned} &\mathbb{E}(\bar{\mathbf{h}}(\boldsymbol{\theta}^{k-T}; s_k, a_k, s_{k+1}, a_{k+1}) \mid \sigma^{k-T}) \\ &= \sum_{s, s' \in \mathcal{S}, a, a' \in \mathcal{A}} \mathcal{P}(s_k = s \mid s_{k-T}, a_{k-T}) \mathcal{P}(a, s', a' \mid s) \\ &\quad \times \nabla_{\boldsymbol{\theta}} \hat{f}(\boldsymbol{\theta}^{k-T}; \phi(s, a)) \hat{\Delta}(\boldsymbol{\theta}^{k-T}; s, a, s', a') \\ &= \sum_{s, s' \in \mathcal{S}, a, a' \in \mathcal{A}} \mu(s) \mathcal{P}(a, s', a' \mid s) \nabla_{\boldsymbol{\theta}} \hat{f}(\boldsymbol{\theta}^{k-T}; \phi(s, a)) \times \hat{\Delta}(\boldsymbol{\theta}^{k-T}; s, a, s', a') \\ &\quad + \sum_{s, s' \in \mathcal{S}, a, a' \in \mathcal{A}} \mathcal{P}(a, s', a' \mid s) (\mathcal{P}(s_k = s \mid s_{k-T}, a_{k-T}) - \mu(s)) \nabla_{\boldsymbol{\theta}} \hat{f}(\boldsymbol{\theta}^{k-T}; \phi(s, a)) \\ &\quad \times \hat{\Delta}(\boldsymbol{\theta}^{k-T}; s, a, s', a'). \end{aligned} \quad (31)$$

Notice that the following expectation

$$\sum_{s, s' \in \mathcal{S}, a, a' \in \mathcal{A}} \mu(s) \mathcal{P}(a, s', a' \mid s) \nabla_{\boldsymbol{\theta}} \hat{f}(\boldsymbol{\theta}^{k-T}; \phi(s, a)) \hat{\Delta}(\boldsymbol{\theta}^{k-T}; s, a, s', a') = \mathbf{h}(\boldsymbol{\theta}^{k-T}).$$

The Markovian property tells us  $\sum_{s \in \mathcal{S}} |\mathcal{P}(s_k = s \mid s_{k-T}, a_{k-T}) - \mu(s)| \leq \bar{\kappa} \rho^T$ . Due to that  $\hat{f} \in \mathcal{F}_{\mathbf{V}, m}$ ,  $\nabla_{\boldsymbol{\theta}} \hat{f}(\boldsymbol{\theta}^{k-T}; \phi(s, a)) = \nabla_{\boldsymbol{\theta}} f(\boldsymbol{\theta}^{\text{init}}; \phi(s, a))$ . With Lemma 1,  $\|\nabla_{\boldsymbol{\theta}} \hat{f}(\boldsymbol{\theta}^{k-T}; \phi(s, a))\| \leq C_3 \sqrt{m}$  and

$$\begin{aligned} |\hat{\Delta}(\boldsymbol{\theta}^{k-T}; s, a, s', a')| &= \left| \hat{f}(\boldsymbol{\theta}^{k-T}; \phi(s, a)) - r(s, s') - \gamma \hat{f}(\boldsymbol{\theta}^{k-T}; \phi(s', a')) \right| \\ &\leq (2 + \gamma) C_4 \sqrt{\log \frac{K}{\delta}}, \end{aligned}$$

with probability at least  $1 - 2\delta - 3L^2 \exp(-C_6 m \omega^{2/3} L)$ .

## D.2 Proof of Lemma 3

With the definition of the stationary point, we have  $\langle \mathbf{h}(\boldsymbol{\theta}^*), \boldsymbol{\theta} - \boldsymbol{\theta}^* \rangle \geq 0$ . Therefore, we are led to

$$\begin{aligned} \langle \mathbf{h}(\boldsymbol{\theta}), \boldsymbol{\theta} - \boldsymbol{\theta}^* \rangle &\geq \langle \mathbf{h}(\boldsymbol{\theta}) - \mathbf{h}(\boldsymbol{\theta}^*), \boldsymbol{\theta} - \boldsymbol{\theta}^* \rangle \\ &= \mathbb{E}[\langle \hat{\Delta}(s, a, s', a'; \boldsymbol{\theta}) - \hat{\Delta}(s, a, s', a'; \boldsymbol{\theta}^*) \rangle \times \nabla_{\boldsymbol{\theta}} f(\boldsymbol{\theta}_0; s, a), \boldsymbol{\theta} - \boldsymbol{\theta}^* \mid \boldsymbol{\theta}^{\text{init}}] \\ &= \mathbb{E}[\langle \hat{f}(\boldsymbol{\theta}; s, a) - \hat{f}(\boldsymbol{\theta}^*; s, a) \rangle \times \langle \nabla_{\boldsymbol{\theta}} f(\boldsymbol{\theta}_0; s, a), \boldsymbol{\theta} - \boldsymbol{\theta}^* \rangle \mid \boldsymbol{\theta}^{\text{init}}] \\ &\quad - \gamma \mathbb{E}[\langle \hat{f}(\boldsymbol{\theta}; s', a') - \hat{f}(\boldsymbol{\theta}^*; s', a') \rangle \times \langle \nabla_{\boldsymbol{\theta}} f(\boldsymbol{\theta}_0; s, a), \boldsymbol{\theta} - \boldsymbol{\theta}^* \rangle \mid \boldsymbol{\theta}^{\text{init}}] \\ &= \mathbb{E}[|\hat{f}(\boldsymbol{\theta}; s, a) - \hat{f}(\boldsymbol{\theta}^*; s, a)|^2 \mid \boldsymbol{\theta}^{\text{init}}] \\ &\quad - \gamma \mathbb{E}[\langle \hat{f}(\boldsymbol{\theta}; s', a') - \hat{f}(\boldsymbol{\theta}^*; s', a') \rangle \times (\hat{f}(\boldsymbol{\theta}; s, a) - \hat{f}(\boldsymbol{\theta}^*; s, a)) \mid \boldsymbol{\theta}^{\text{init}}] \\ &\geq (1 - \gamma) \mathbb{E}[|\hat{f}(\boldsymbol{\theta}; s, a) - \hat{f}(\boldsymbol{\theta}^*; s, a)|^2 \mid \boldsymbol{\theta}^{\text{init}}], \end{aligned}$$

where we used

$$\begin{aligned} &\mathbb{E}[\langle \hat{f}(\boldsymbol{\theta}; s', a') - \hat{f}(\boldsymbol{\theta}^*; s', a') \rangle (\hat{f}(\boldsymbol{\theta}; s, a) - \hat{f}(\boldsymbol{\theta}^*; s, a)) \mid \boldsymbol{\theta}^{\text{init}}] \\ &\leq \mathbb{E}[\hat{f}(\boldsymbol{\theta}; s', a') - \hat{f}(\boldsymbol{\theta}^*; s', a') \mid \boldsymbol{\theta}^{\text{init}}] \cdot \mathbb{E}[\hat{f}(\boldsymbol{\theta}; s, a) - \hat{f}(\boldsymbol{\theta}^*; s, a) \mid \boldsymbol{\theta}^{\text{init}}] \end{aligned}$$

and

$$\mathbb{E}[\hat{f}(\boldsymbol{\theta}; s', a') - \hat{f}(\boldsymbol{\theta}^*; s', a') \mid \boldsymbol{\theta}^{\text{init}}] = \mathbb{E}[\hat{f}(\boldsymbol{\theta}; s, a) - \hat{f}(\boldsymbol{\theta}^*; s, a) \mid \boldsymbol{\theta}^{\text{init}}]$$

for the same distribution for  $s, a$  and  $s', a'$ . Furthermore, with Assumption 3, we then proved the result.

## D.3 Proof of Lemma 4

Recall  $\mathbf{m}^k = (1 - \beta) \sum_{j=1}^{k-1} \beta^{k-1-j} \mathbf{g}^j$  and  $v^k \geq v^1 \geq \varpi > 0$ , we then have

$$\begin{aligned} \|\mathbf{m}^k\|^2 / v^k &\leq (1 - \beta)^2 \left\| \sum_{j=1}^{k-1} \beta^{k-1-j} \mathbf{g}^j / (v^k)^{\frac{1}{2}} \right\|^2 \\ &\stackrel{a)}{\leq} (1 - \beta)^2 \left( \sum_{j=1}^{k-1} \beta^{k-1-j} \right) \cdot \sum_{j=1}^{k-1} \beta^{k-1-j} \|\mathbf{g}^j\|^2 / v^k \\ &\leq (1 - \beta)^2 \cdot \frac{1}{1 - \beta} \cdot \sum_{j=1}^{k-1} \beta^{k-1-j} \|\mathbf{g}^j\|^2 / v^k \\ &= (1 - \beta) \cdot \sum_{j=1}^{k-1} \beta^{k-1-j} \|\mathbf{g}^j\|^2 / v^k \\ &\stackrel{b)}{=} (1 - \beta) \cdot \sum_{j=1}^{k-1} \beta^{k-1-j} \|\mathbf{g}^j\|^2 / v^j \end{aligned}$$

where a) uses the fact  $\sum_{i=1}^d (\sum_{j=1}^{k-1} a_j b_{i,j})^2 \leq \sum_{i=1}^d \sum_{j=1}^{k-1} a_j^2 \sum_{j=1}^{k-1} b_{i,j}^2$  with  $a_j = \beta^{\frac{k-1-j}{2}}$  and  $b_{i,j} = \beta^{\frac{k-1-j}{2}} \mathbf{g}_i^j / (v^k)^{\frac{1}{2}}$  for any  $i \in \{1, 2, \dots, d\}$ , and b) is due to  $v^j \leq v^k$  when  $j \leq k-1$ . Then, we get

$$\begin{aligned} & \sum_{k=1}^K \sum_{j=1}^{k-1} \beta^{k-1-j} \|\mathbf{g}^j\|^2 / v^j = \sum_{j=1}^{K-1} \sum_{k=j}^{K-1} \beta^{k-j} \|\mathbf{g}^j\|^2 / v^j \\ & = \sum_{j=1}^{K-1} \sum_{k=j}^{K-1} \beta^{k-j} \|\mathbf{g}^j\|^2 / v^j \leq \frac{1}{1-\beta} \sum_{j=1}^{K-1} \|\mathbf{g}^j\|^2 / v^j. \end{aligned}$$

Combining the inequalities above, we then get the result. To get the second bound, we used Lemma 7 below.

**Lemma 7 ([10, 31])** For  $\varpi \leq a_i \leq \bar{a}$ , we have

$$\sum_{t=1}^T \frac{a_t}{\sum_{i=1}^t a_i} \leq \log\left(\frac{T\bar{a}}{\varpi}\right).$$

Directly using Lemma 7 and Lemma 10, we then get the results.

#### D.4 Proof of Lemma 5

Notice that

$$\begin{aligned} & \mathbb{E}\left[\langle \boldsymbol{\theta}^k - \boldsymbol{\theta}^*, \mathbf{g}^k \rangle / (v^{k-1})^{\frac{1}{2}}\right] = \mathbb{E}\left[\langle \boldsymbol{\theta}^k - \boldsymbol{\theta}^*, \mathbf{h}^k \rangle / (v^{k-1})^{\frac{1}{2}}\right] \\ & + \mathbb{E}\left[\langle \boldsymbol{\theta}^k - \boldsymbol{\theta}^*, \mathbf{g}^k - \mathbf{h}^k \rangle / (v^{k-1})^{\frac{1}{2}}\right]. \end{aligned} \quad (32)$$

We have known that  $\langle \boldsymbol{\theta}^k - \boldsymbol{\theta}^*, \mathbf{g}^k - \mathbf{h}^k \rangle / (v^{k-1})^{\frac{1}{2}}$ , which can be bounded by Lemma 1. Now we consider the term  $\mathbb{E}\left[\langle \boldsymbol{\theta}^k - \boldsymbol{\theta}^*, \mathbf{h}^k \rangle / (v^{k-1})^{\frac{1}{2}}\right]$ . Direct calculation gives us

$$\begin{aligned} & \mathbb{E}\left[\langle \boldsymbol{\theta}^k - \boldsymbol{\theta}^*, \mathbf{h}^k \rangle / (v^{k-1})^{\frac{1}{2}}\right] \stackrel{a)}{=} \mathbb{E}\left[\langle \boldsymbol{\theta}^k - \boldsymbol{\theta}^*, \mathbf{h}(\boldsymbol{\theta}^k) \rangle / (v^{k-1})^{\frac{1}{2}}\right] \\ & + \underbrace{\mathbb{E}\left[\frac{|\langle \boldsymbol{\theta}^k - \boldsymbol{\theta}^*, [\mathbf{h}^k - \bar{\mathbf{h}}(\boldsymbol{\theta}^{k-T}; s_k, a_k, s_{k+1}, a_{k+1})] \rangle|}{(v^{k-1})^{\frac{1}{2}}}\right]}_{\text{I}} \\ & + \underbrace{\mathbb{E}\left[\frac{|\langle \boldsymbol{\theta}^k - \boldsymbol{\theta}^*, [\bar{\mathbf{h}}(\boldsymbol{\theta}^{k-T}; s_k, a_k, s_{k+1}, a_{k+1}) - \mathbf{h}(\boldsymbol{\theta}^{k-T})] \rangle|}{(v^{k-1})^{\frac{1}{2}}}\right]}_{\text{II}} \\ & + \underbrace{\mathbb{E}\left[|\langle \boldsymbol{\theta}^k - \boldsymbol{\theta}^*, [\mathbf{h}(\boldsymbol{\theta}^{k-T}) - \mathbf{h}(\boldsymbol{\theta}^k)] \rangle| / (v^{k-1})^{\frac{1}{2}}\right]}_{\text{III}}, \end{aligned} \quad (33)$$

where a) depends on the fact that  $\mathbf{h}^k = \mathbf{h}(\boldsymbol{\theta}^k) + \mathbf{h}^k - \bar{\mathbf{h}}(\boldsymbol{\theta}^{k-T}; s_k, a_k, s_{k+1}, a_{k+1}) + \bar{\mathbf{h}}(\boldsymbol{\theta}^{k-T}; s_k, a_k, s_{k+1}, a_{k+1}) - \mathbf{h}(\boldsymbol{\theta}^{k-T}) + \mathbf{h}(\boldsymbol{\theta}^{k-T}) - \mathbf{h}(\boldsymbol{\theta}^k)$ . Note that, with probability at least



$1 - 2\delta - 3L^2 \exp(-C_6 m \omega^{2/3} L)$ , we have

$$\begin{aligned}
& \left\| \left[ \mathbf{h}^k - \bar{\mathbf{h}}(\boldsymbol{\theta}^{k-T}; s_k, a_k, s_{k+1}, a_{k+1}) \right] \right\| \\
& \leq \left\| \widehat{\Delta} \left( \boldsymbol{\theta}^k; s_k, a_k, s_{k+1}, a_{k+1} \right) \nabla_{\boldsymbol{\theta}} \widehat{f}(\boldsymbol{\theta}^k; \phi(s_k, a_k)) \right. \\
& \quad \left. - \widehat{\Delta} \left( \boldsymbol{\theta}^{k-T}; s_k, a_k, s_{k+1}, a_{k+1} \right) \nabla_{\boldsymbol{\theta}} \widehat{f}(\boldsymbol{\theta}^{k-T}; \phi(s_k, a_k)) \right\| \\
& \leq \left\| \widehat{\Delta} \left( \boldsymbol{\theta}^k; s_k, a_k, s_{k+1}, a_{k+1} \right) \nabla_{\boldsymbol{\theta}} \widehat{f}(\boldsymbol{\theta}^k; \phi(s_k, a_k)) \right. \\
& \quad \left. - \widehat{\Delta} \left( \boldsymbol{\theta}^{k-T}; s_k, a_k, s_{k+1}, a_{k+1} \right) \nabla_{\boldsymbol{\theta}} \widehat{f}(\boldsymbol{\theta}^k; \phi(s_k, a_k)) \right\| \\
& \stackrel{a)}{\leq} \left\| \widehat{\Delta} \left( \boldsymbol{\theta}^k; s_k, a_k, s_{k+1}, a_{k+1} \right) - \widehat{\Delta} \left( \boldsymbol{\theta}^{k-T}; s_k, a_k, s_{k+1}, a_{k+1} \right) \right\| \cdot \left\| \nabla_{\boldsymbol{\theta}} \widehat{f}(\boldsymbol{\theta}^k; \phi(s_k, a_k)) \right\| \\
& \stackrel{b)}{\leq} \left( \left\| \nabla_{\boldsymbol{\theta}} \widehat{f}(\boldsymbol{\theta}^k; \phi(s_k, a_k)) \right\| + \gamma \left\| \nabla_{\boldsymbol{\theta}} \widehat{f}(\boldsymbol{\theta}^k; \phi(s_{k+1}, a_{k+1})) \right\| \right) \times \left\| \boldsymbol{\theta}^k - \boldsymbol{\theta}^{k-T} \right\| \cdot \left\| \nabla_{\boldsymbol{\theta}} \widehat{f}(\boldsymbol{\theta}^k; \phi(y)) \right\| \\
& \leq (1 + \gamma) C_3 C_4 \sqrt{m \log(K/\delta)} \left\| \boldsymbol{\theta}^k - \boldsymbol{\theta}^{k-T} \right\|,
\end{aligned}$$

where  $a)$  used  $\nabla_{\boldsymbol{\theta}} \widehat{f}(\boldsymbol{\theta}^{k-T}) = \nabla_{\boldsymbol{\theta}} \widehat{f}(\boldsymbol{\theta}^k)$ , and  $b)$  is from Lemma 1. Thus, with the same probability, we have

$$\text{I} \leq (1 + \gamma) C_3 C_4 \sqrt{m \log(K/\delta)} \times \mathbb{E} \left[ \left\| \boldsymbol{\theta}^k - \boldsymbol{\theta}^* \right\| \cdot \left\| \boldsymbol{\theta}^k - \boldsymbol{\theta}^{k-T} \right\| / (v^{k-1})^{\frac{1}{2}} \right].$$

With definition of  $\mathbf{h}$  and the same procedure of the bound for  $I$ ,

$$\text{III} \leq (1 + \gamma) C_3 C_4 \sqrt{m \log(K/\delta)} \times \mathbb{E} \left[ \left\| \boldsymbol{\theta}^k - \boldsymbol{\theta}^* \right\| \cdot \left\| \boldsymbol{\theta}^k - \boldsymbol{\theta}^{k-T} \right\| / (v^{k-1})^{\frac{1}{2}} \right].$$

With Lemma 2, we can get

$$\begin{aligned}
\text{II} & \leq (2 + \gamma) C_3 C_4 \omega \bar{\kappa} \sqrt{L m \log \frac{K}{\delta}} \rho^T / (v^{k-1})^{\frac{1}{2}} \\
& \leq (2 + \gamma) C_3 C_4 \omega \bar{\kappa} \sqrt{L m \log \frac{K}{\delta}} \rho^T / (\varpi)^{\frac{1}{2}}.
\end{aligned}$$

with probability at least  $1 - 2\delta - 3L^2 \exp(-C_6 m \omega^{2/3} L)$ . Combing the bounds I and III together, we have

$$\begin{aligned}
\text{I} + \text{III} & \leq (1 + \gamma) C_3 C_4 \sqrt{m \log(K/\delta)} \times \sum_{h=1}^T \mathbb{E} \left[ \frac{\left\| \boldsymbol{\theta}^k - \boldsymbol{\theta}^* \right\| \cdot \left\| \boldsymbol{\theta}^{k+1-h} - \boldsymbol{\theta}^{k-h} \right\|}{(v^{k-1})^{\frac{1}{2}}} \right] \\
& \leq 2(1 + \gamma) C_3 C_4 \eta \sqrt{m \log(K/\delta)} \times \sum_{h=1}^T \mathbb{E} \left[ \frac{\left\| \boldsymbol{\theta}^k - \boldsymbol{\theta}^* \right\| \cdot \left\| \mathbf{m}^{k-h} \right\|}{(v^{k-1})^{\frac{1}{2}} \cdot (v^{k-h})^{\frac{1}{2}}} \right], \tag{34}
\end{aligned}$$

where we used the following estimate

$$\left\| \boldsymbol{\theta}^{k+1-h} - \boldsymbol{\theta}^{k-h} \right\| = \left\| \mathbf{Proj}_{\mathbf{V}}(\boldsymbol{\theta}^{k-h} - \eta \mathbf{m}^{k-h} / (v^{k-h})^{\frac{1}{2}}) - \mathbf{Proj}_{\mathbf{V}}(\boldsymbol{\theta}^{k-h}) \right\| \leq \eta \left\| \mathbf{m}^{k-h} / (v^{k-h})^{\frac{1}{2}} \right\|.$$

The Cauchy-Schwarz inequality then gives us

$$\begin{aligned}
& \sum_{h=1}^T \frac{\left\| \boldsymbol{\theta}^k - \boldsymbol{\theta}^* \right\| \cdot \left\| \mathbf{m}^{k-h} \right\|}{(v^{k-1})^{\frac{1}{2}} \cdot (v^{k-h})^{\frac{1}{2}}} \leq \sum_{h=1}^T \frac{\left\| \boldsymbol{\theta}^k - \boldsymbol{\theta}^* \right\|}{(v^{k-1})^{1/2}} \cdot \frac{\left\| \mathbf{m}^{k-h} \right\|}{(v^{k-h})^{1/2}} \\
& \leq \sum_{h=1}^T \left( \frac{\left\| \boldsymbol{\theta}^k - \boldsymbol{\theta}^* \right\|^2}{v^{k-1}} + \frac{\left\| \mathbf{m}^{k-h} \right\|^2}{v^{k-h}} \right) \leq \sum_{h=1}^T \left( \frac{\omega^2 L}{\varpi} + \frac{\left\| \mathbf{m}^{k-h} \right\|^2}{v^{k-h}} \right). \tag{35}
\end{aligned}$$

Combining (33), (34), (35) and (12), we then get the result.

## D.5 Proof of Lemma 6

Obviously it holds that

$$\mathbb{E} \left( \frac{\langle \boldsymbol{\theta}^k - \boldsymbol{\theta}^*, \mathbf{m}^k \rangle}{(v^k)^{\frac{1}{2}}} \right) = \underbrace{\mathbb{E} \left( \frac{\langle \boldsymbol{\theta}^k - \boldsymbol{\theta}^*, \mathbf{m}^k \rangle}{(v^{k-1})^{\frac{1}{2}}} \right)}_{\text{I}} + \underbrace{\mathbb{E} \left( \frac{\langle \boldsymbol{\theta}^k - \boldsymbol{\theta}^*, \mathbf{m}^k \rangle}{(v^k)^{\frac{1}{2}}} - \frac{\langle \boldsymbol{\theta}^k - \boldsymbol{\theta}^*, \mathbf{m}^k \rangle}{(v^{k-1})^{\frac{1}{2}}} \right)}_{\text{II}}$$

We first consider the term II. With the Cauchy's inequality, we are led to

$$\begin{aligned} \text{II} &\leq \|\boldsymbol{\theta}^k - \boldsymbol{\theta}^*\| \cdot \|\mathbf{m}^k\| \cdot (1/(v^{k-1})^{\frac{1}{2}} - 1/(v^k)^{\frac{1}{2}}) \\ &\leq \omega(2 + \gamma)C_7\sqrt{Lm \log(K/\delta)}(1/(v^{k-1})^{\frac{1}{2}} - 1/(v^k)^{\frac{1}{2}}), \end{aligned}$$

with probability at least  $1 - 2\delta - 3L^2 \exp(-C_6m\omega^{2/3}L)$ . We use a shorthand notation  $\Lambda := \mathbb{E}(\langle \boldsymbol{\theta}^k - \boldsymbol{\theta}^*, \mathbf{g}^k \rangle / (v^{k-1})^{\frac{1}{2}})$  and then get

$$\begin{aligned} \text{I} &= \mathbb{E} \left( \langle \boldsymbol{\theta}^k - \boldsymbol{\theta}^*, \beta \mathbf{m}^{k-1} + (1 - \beta) \mathbf{g}^k \rangle / (v^{k-1})^{\frac{1}{2}} \right) \\ &= (1 - \beta) \cdot \Lambda + \beta \langle \boldsymbol{\theta}^k - \boldsymbol{\theta}^*, \mathbf{m}^{k-1} \rangle / (v^{k-1})^{\frac{1}{2}} \\ &= (1 - \beta) \cdot \Lambda + \beta \langle \boldsymbol{\theta}^{k-1} - \boldsymbol{\theta}^*, \mathbf{m}^{k-1} \rangle / (v^{k-1})^{\frac{1}{2}} + \beta \langle \boldsymbol{\theta}^k - \boldsymbol{\theta}^{k-1}, \mathbf{m}^{k-1} \rangle / (v^{k-1})^{\frac{1}{2}} \\ &\stackrel{a)}{\leq} (1 - \beta) \cdot \Lambda + \beta \langle \boldsymbol{\theta}^{k-1} - \boldsymbol{\theta}^*, \mathbf{m}^{k-1} \rangle / (v^{k-1})^{\frac{1}{2}} + \beta \|\boldsymbol{\theta}^{k-1} - \boldsymbol{\theta}^k\| \cdot \|\mathbf{m}^{k-1}\| / (v^{k-1})^{\frac{1}{2}} \\ &\stackrel{b)}{\leq} (1 - \beta) \cdot \Lambda + \beta \langle \boldsymbol{\theta}^{k-1} - \boldsymbol{\theta}^*, \mathbf{m}^{k-1} \rangle / (v^{k-1})^{\frac{1}{2}} + \eta\beta \|\mathbf{m}^{k-1}\|^2 / (v^{k-1}) \\ &\leq (1 - \beta) \cdot \Lambda + \beta \langle \boldsymbol{\theta}^{k-1} - \boldsymbol{\theta}^*, \mathbf{m}^{k-1} \rangle / (v^{k-1})^{\frac{1}{2}} + \eta\beta \|\mathbf{m}^{k-1}\|^2 / (v^{k-1}), \end{aligned}$$

where *a)* uses the Cauchy's inequality, and *b)* depends on the scheme of the algorithm. Taking expectations on both sides of I, we are then led to

$$\text{I} \leq (1 - \beta) \mathbb{E} \left( \langle \boldsymbol{\theta}^k - \boldsymbol{\theta}^*, \mathbf{g}^k \rangle / (v^{k-1})^{\frac{1}{2}} \right) + \beta \Upsilon_{k-1} + \eta\beta \mathbb{E} \left( \|\mathbf{m}^{k-1}\|^2 / (v^{k-1}) \right).$$

Combination of the inequalities I, II and Lemma 5 gives the final result.
